# Supplementary material for: A homogenized daily in situ PM 2.5 concentration dataset from national air qualitymonitoring network in China
Source: Copernicus journal article supplement (doi:10.5194/essd-2020-121), 2020-07-29
Supplement: Supplementary file 1 [file essd-2020-121-supplement.pdf]

## ***Supporting information for***

### **A homogenized daily *in situ* PM<sub>2.5</sub> concentration dataset from national air quality monitoring network in China**

Kaixu Bai<sup>1,2,3</sup>, Ke Li<sup>3</sup>, Chengbo Wu<sup>3</sup>, Ni-Bin Chang<sup>4</sup>, Jianping Guo<sup>5\*</sup>

<sup>1</sup>Key Laboratory of Geographic Information Science (Ministry of Education), East China Normal University, Shanghai, China

<sup>2</sup>Institute of Eco-Chongming, 20 Cuiniao Rd., Chongming, Shanghai, China

<sup>3</sup>School of Geographic Sciences, East China Normal University, Shanghai, China

<sup>4</sup>Department of Civil, Environmental, and Construction Engineering, University of Central Florida, Orlando, FL, USA

<sup>5</sup>State Key Laboratory of Severe Weather, Chinese Academy of Meteorological Sciences, Beijing, China

\*Correspondence to: Dr./Prof. Jianping Guo ([jpguocams@gmail.com](mailto:jpguocams@gmail.com))

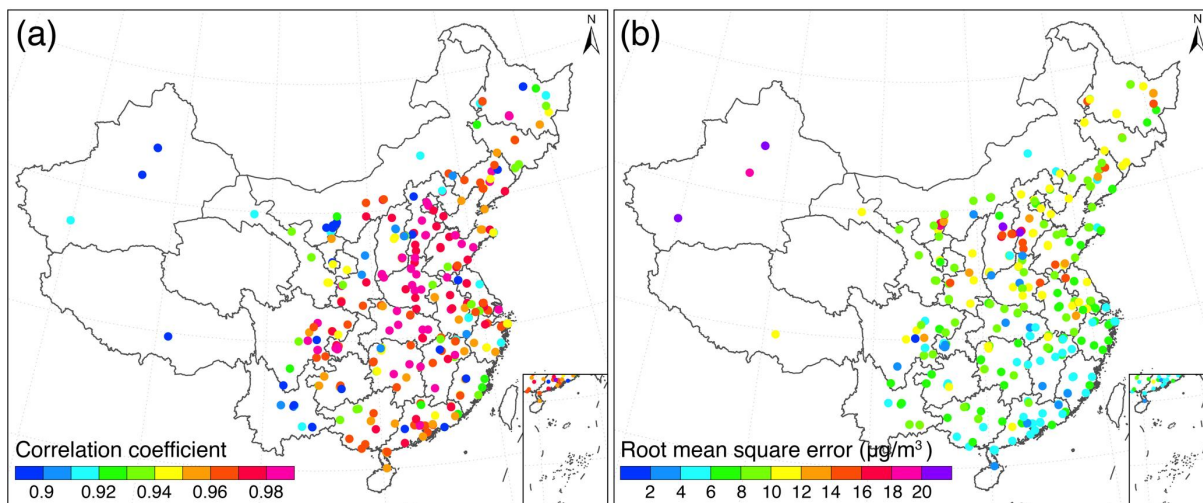

**Figure S1.** Spatial patterns of (a) correlation coefficient and (b) root mean square error between PM<sub>2.5</sub> concentration records failing to pass the homogeneity test and their corresponding reference series. Statistics were calculated on the basis of daily PM<sub>2.5</sub> concentration time series.

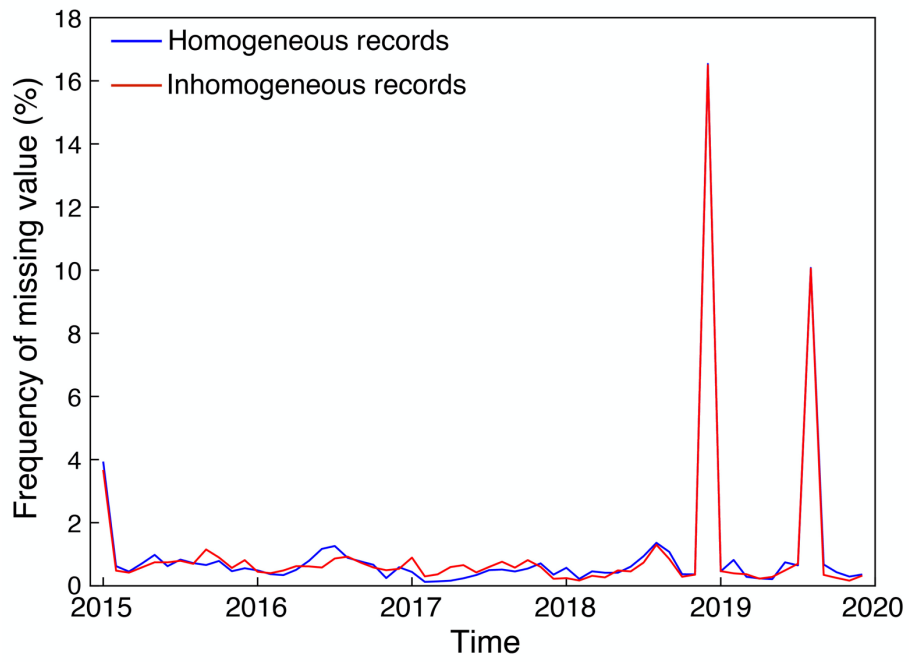

**Figure S2.** Comparisons of monthly mean frequency of missing values in hourly PM<sub>2.5</sub> concentration records during 2015–2019.

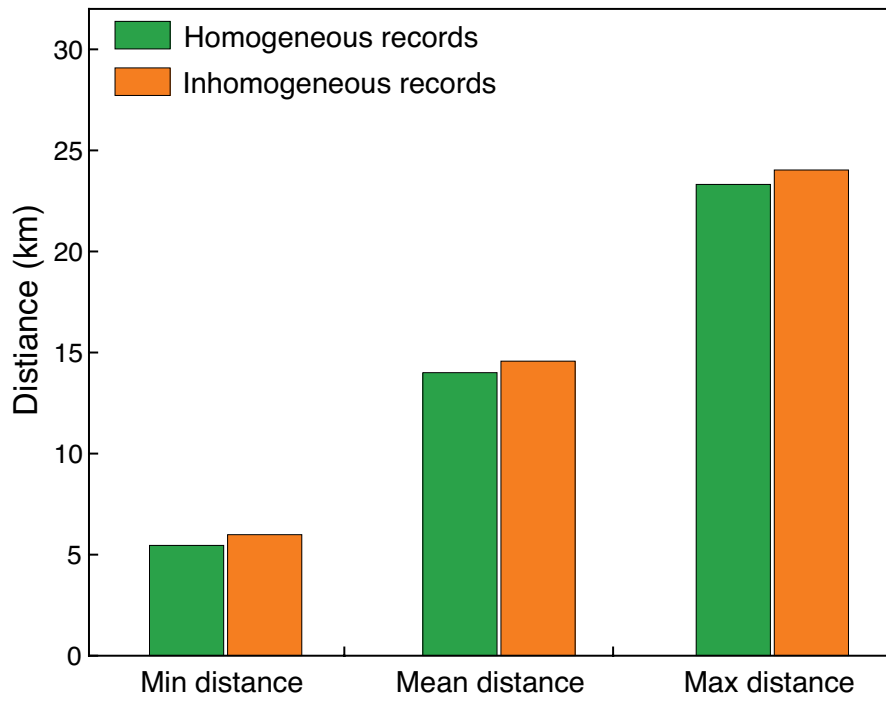

**Figure S3.** Comparisons of the average spatial distance between the base and neighboring PM<sub>2.5</sub> series.

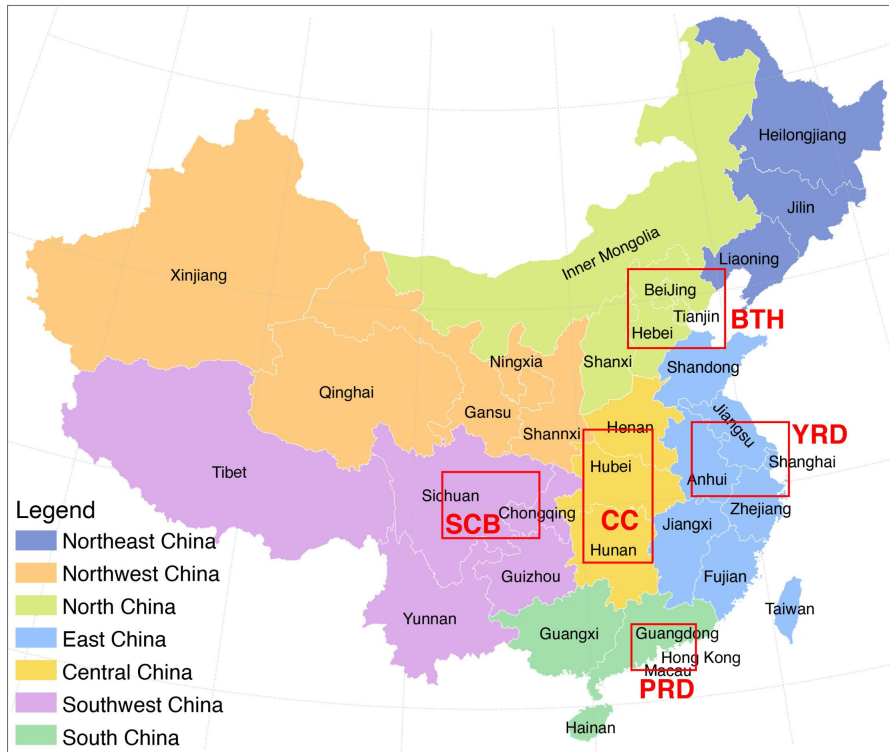

**Figure S4.** Geographic locations of five regions of interest (ROIs). BTH, YRD, CC, SCB, and PRD denote regions of Beijing-Tianjin-Hebei, Yangtze River Delta, Central China, Sichuan Basin, Pearl River Delta, respectively.
